# Supplementary material for: Eruptive Melanocytic Nevi in the Setting of Encorafenib, Cetuximab, and Binimetinib Combination Therapy: A Case Report
Source: PubMed Central journal article supplement — Case Rep Dermatol. 2024 May 28;16(1):133–9. doi: 10.1159/000539058 (PMC11147515; doi:10.1159/000539058), 2024-05-28

**Supplementary Material 1.** Paradoxical activation of the MAPK signaling pathway in *BRAF* wild-type (*BRAF*<sup>WT</sup>) cells following BRAF inhibitor monotherapy vs. encorafenib, cetuximab, and binimetinib triplet therapy in *BRAF* V600E-mutant tumors. (Created with BioRender.com.)

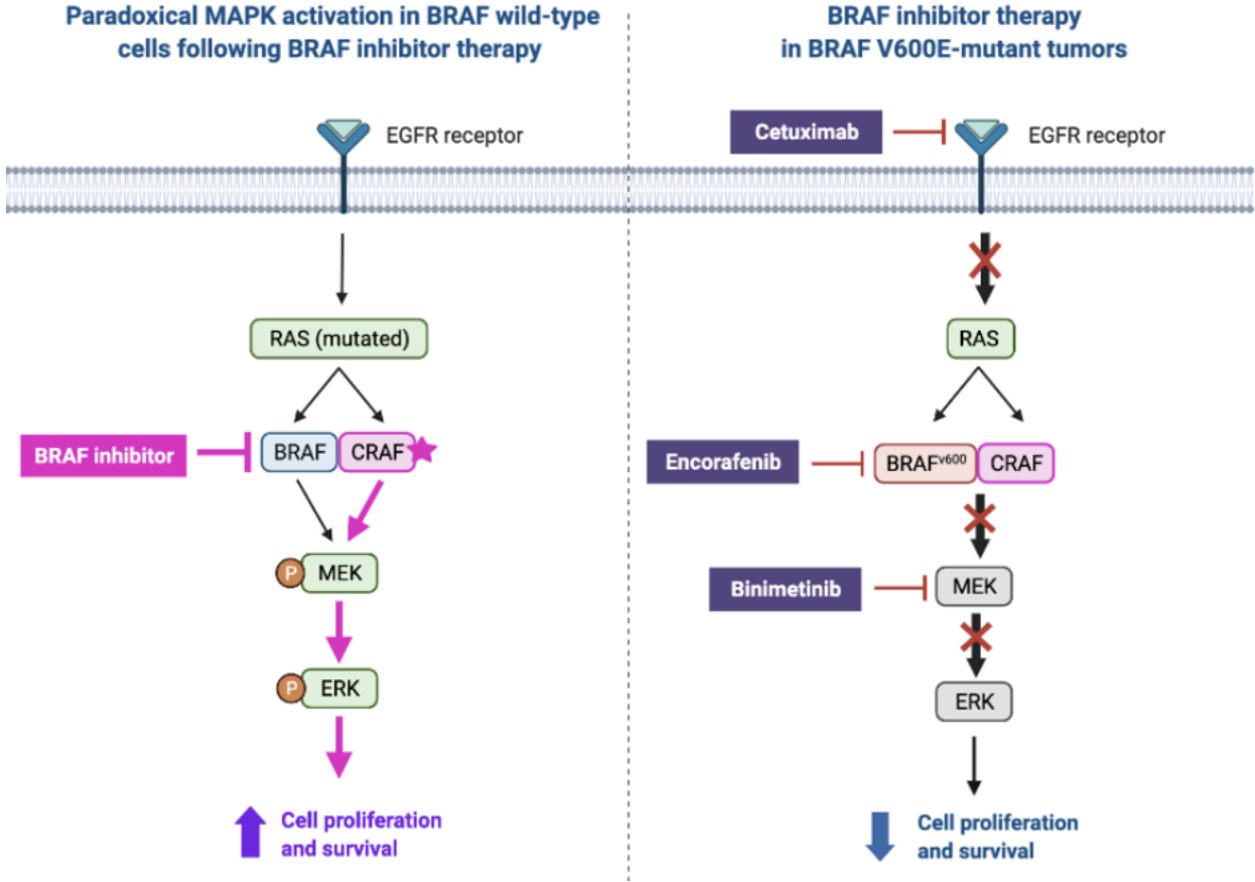

Supplement: Supplementary_material-Suppl.1-s1.pdf [file Supplementary_material-Suppl.1-s1.pdf]
